# Supplementary material for: A Single Dose Oral Azithromycin versus Intramuscular Benzathine Penicillin for the Treatment of Yaws-A Randomized Non Inferiority Trial in Ghana
Source: PubMed Central journal article supplement (PMC5224786; doi:10.1371/journal.pntd.0005154), 2017-01-10

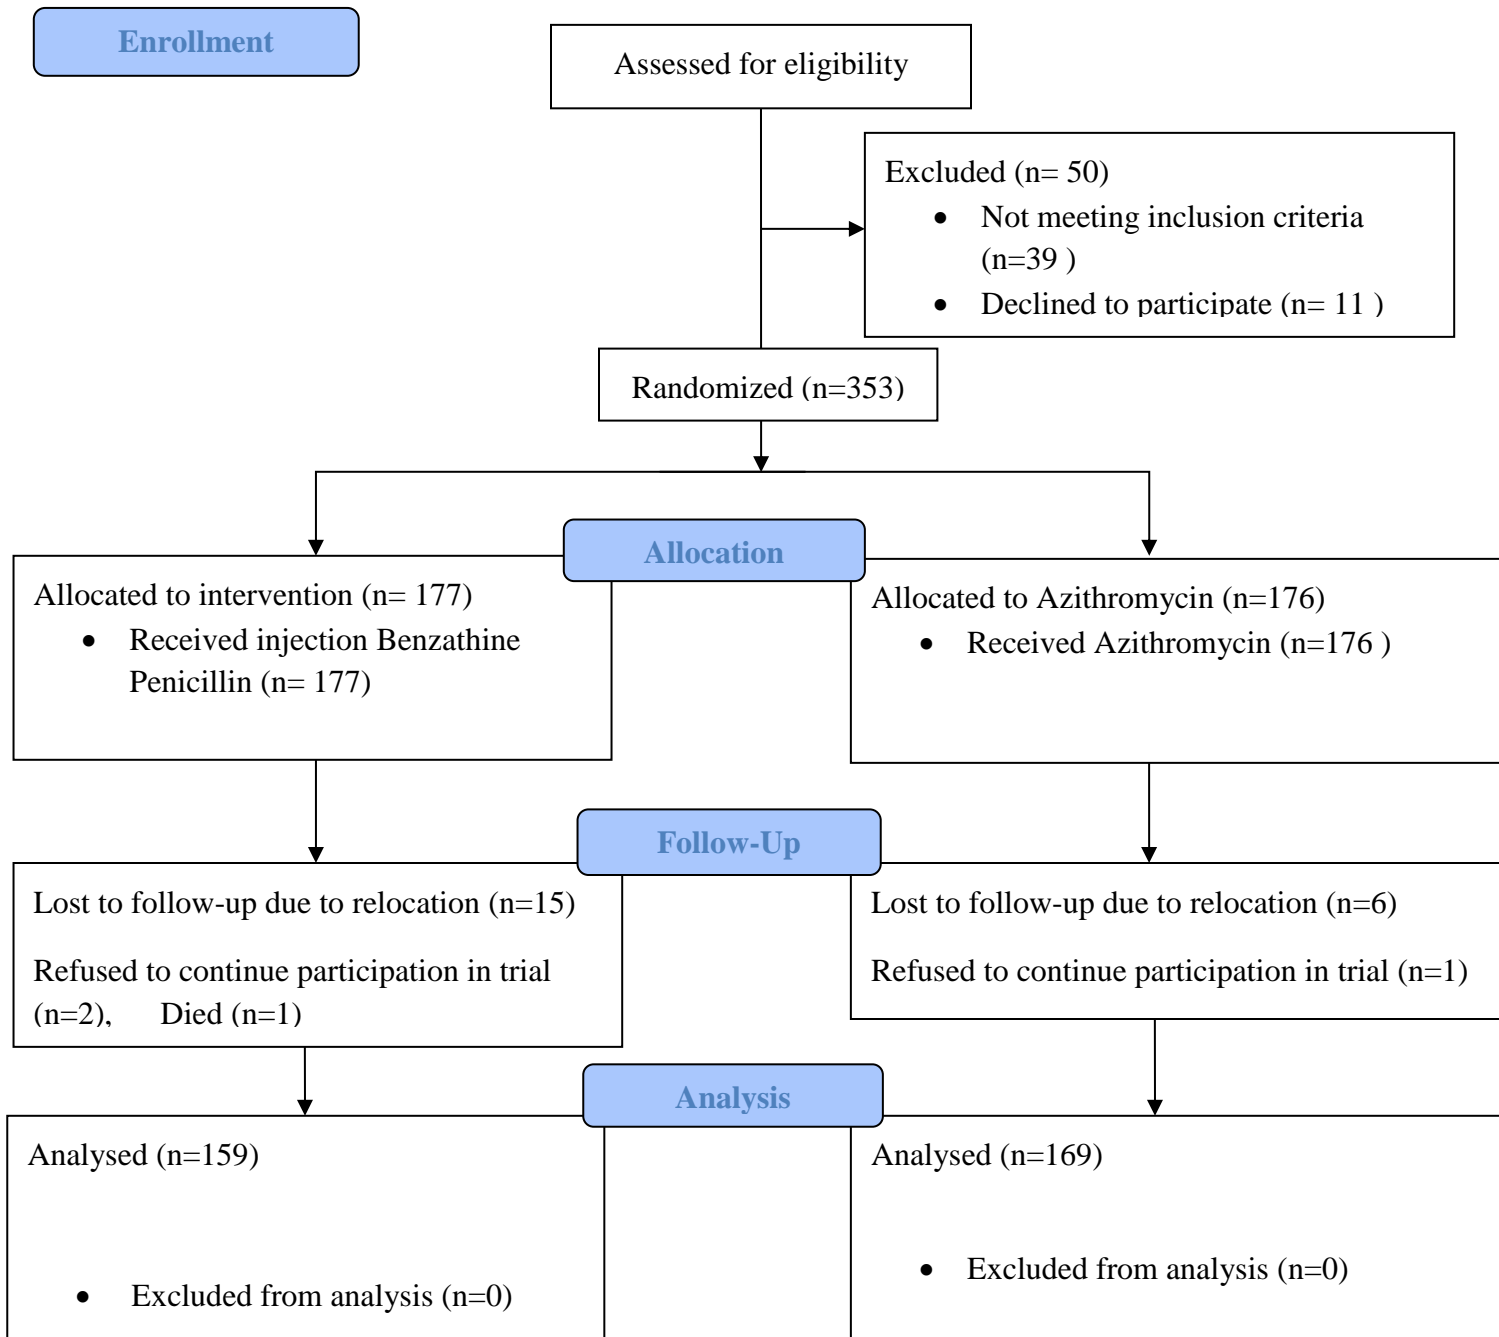

Supplement: pntd.0005154.s001.pdf [file pntd.0005154.s001.pdf]
